# Supplementary material
Source: MDPI journal article supplement (https://www.mdpi.com/2073-4344/13/7/1136)
Supplement: s1 [file s1]

## Supplementary Materials

# Efficient and Stable Degradation of Triazophos Pesticide by TiO<sub>2</sub>/WO<sub>3</sub> Nanocomposites with S-Scheme Heterojunctions and Oxygen Defects

Wen Li <sup>1</sup>, Chunxu Chen <sup>1</sup>, Renqiang Yang <sup>1</sup>, Shuangli Cheng <sup>1</sup>, Xiaoyu Sang <sup>1</sup>, Meiwen Zhang <sup>1</sup>, Jinfeng Zhang <sup>2,\*</sup>, Zhenghua Wang <sup>3</sup> and Zhen Li <sup>1,\*</sup>

<sup>1</sup> College of Food Engineering, Anhui Science and Technology University, Fengyang 233100, China; yjs2022273@ahstu.edu.cn (W.L.); ccx1205@126.com (C.C.); 18954105864@163.com (R.Y.); 15249929336@163.com (S.C.); sanghuaiyu@163.com (X.S.); 13866908959@163.com (M.Z.)

<sup>2</sup> Anhui Province Key Laboratory of Pollutant Sensitive Materials and Environmental Remediation, School of Physics and Electronic Information, Huaibei Normal University, Huaibei 235000, China

<sup>3</sup> Key Laboratory of Functional Molecular Solids, Ministry of Education, College of Chemistry and Materials Science, Anhui Normal University, Wuhu 241000, China; zhwang@ahnu.edu.cn

\* Correspondence: jfzhang@chnu.edu.cn (J.Z.); lizhen@ahstu.edu.cn (Z.L.)

## 1. Experimental

### 1.1. Equations

The band gap ( $E_g$ ), valence band ( $E_{VB}$ ) and conduction band ( $E_{CB}$ ) of the photocatalysts can be obtained from the following equation (Eq.)

$$\alpha(h\nu) = A(h\nu - E_g)^{1/2} \quad (S1)$$

$$E_{VB} = X - E^e + 0.5E_g \quad (S2)$$

$$E_{CB} = E_{VB} - E_g \quad (S3)$$

Here,  $\alpha$  is the absorption coefficient,  $h$  represents Planck constant,  $\nu$  represents light frequency and  $A$  is a constant.  $E^e$  is a constant with a value of 4.5 eV. The  $X$  values of WO<sub>3</sub>, TiO<sub>2</sub> are 6.59 and 5.81 eV, respectively.

### 1.2. DFT calculations

We use density functional theory (DFT) to describe plane wave expansion of wave function, pseudopotential description of electron-nucleus interaction and first-principle pseudopotential of electron-electron interaction. We used CASTEP (Cambridge Serial Total Energy Package) in materials studio to calculate. The generalized gradient approximation (GGA) proposed by Perdew-Burke-Ernzerhof (PBE) is used to deal with forward variations and related interactions. The convergence accuracy is set to Fine. The energy cutoff was set as 400 eV. A vacuum layer of 20 Å was constructed to eliminate interactions between periodic structures of surface models. Other parameters use default values.

**Table S1.** The amounts of chemicals for preparing WO and TO/WO nanocomposites.

| Samples         | TiO <sub>2</sub><br>(mg) | WCl <sub>6</sub><br>(mg) | C <sub>3</sub> H <sub>8</sub> O<br>(ml) |
|-----------------|--------------------------|--------------------------|-----------------------------------------|
| 80-TO/WO        | 200                      | 87.2                     | 35                                      |
| 60-TO/WO        | 200                      | 232.52                   | 35                                      |
| 40-TO/WO        | 200                      | 523.16                   | 35                                      |
| WO <sub>3</sub> | 0                        | 0.5                      | 35                                      |

**Table S2.** This work is compared with the work in the literature.

| Catalyst                                                | Pollutant                            | Light source                          | Catalyst dosage | Degradation | literature |
|---------------------------------------------------------|--------------------------------------|---------------------------------------|-----------------|-------------|------------|
| N-doped TiO <sub>2</sub>                                | Diazinon                             | 350 W Xe lamp                         | 2.5 g/L         | 85 %        | [43]       |
| Cu-ZnO                                                  | Chorpyriphos                         | Sunlight irradiation                  | 3 g/L           | 81 %        | [44]       |
| CS/g-C <sub>3</sub> N <sub>4</sub>                      | Chorpyriphos                         | 300 W Xe lamp<br>75 GaN LEDs emitting | 0.002 g/L       | 85 %        | [45]       |
| CNS-ZnO                                                 | Diazinon                             | UVA,<br>λ=385 nm                      | 0.1 g/L         | 53.4 %      | [46]       |
| ZnO-SiO <sub>2</sub><br>@Fe <sub>3</sub> O <sub>4</sub> | Malathion                            | 8 W UV-C lamp,<br>λ = 254 nm          | 0.3 g/L         | 79.3 %      | [47]       |
| N, S-codoped TiO <sub>2</sub>                           | Tris(2-chloroisopropyl)<br>phosphate | Xenon lamp (2.2 kW), λ<br>> 290 nm    | 250 mg/L        | 35 %        | [48]       |
| In <sub>2</sub> S <sub>3</sub> /BiVO <sub>4</sub>       | Glyphosate                           | 125 W, λ > 400 nm<br>mercury lamp     | 0.4 g/L         | 74.66 %     | [49]       |
| 60-TO/WO                                                | Triazophos                           | 300 W Xe lamp                         | 1 g/L           | 78%         | This work  |
